# Supplementary material for: Effects of Running in Minimal and Conventional Footwear on Medial Tibiofemoral Cartilage Failure Probability in Habitual and Non-Habitual Users
Source: MDPI journal article supplement (doi:10.3390/jcm11247335), 2022-12-09
Supplement: s1 [file s1]

## Section S1.

### 1. Reliability and MDC values

Sample: 10 male participants

|                                       | Walk  |      | Run   |      |
|---------------------------------------|-------|------|-------|------|
|                                       | ICC   | MDC  | ICC   | MDC  |
| Peak medial tibiofemoral force (BW)   | 0.951 | 0.27 | 0.901 | 0.61 |
| Peak medial tibiofemoral stress (MPa) | 0.947 | 0.01 | 0.899 | 0.02 |
| Peak medial tibiofemoral strain       | 0.945 | 0.16 | 0.898 | 0.35 |

Table S1: Reliability and MDC values for running and walking.

|                                             | Mean | SD   |
|---------------------------------------------|------|------|
| Peak medial tibiofemoral force walking (BW) | 3.25 | 0.55 |
| Peak medial tibiofemoral force running (BW) | 8.11 | 1.09 |

Note:  $MDC = 1.96 \times SEM \times \text{square root of } 2$ .

## Section S2.

### 1. Sensitivity analysis

Sample: N = 10 male participants

Table S2: Walking and running velocities

|                        | Mean | SD   |
|------------------------|------|------|
| Walking Velocity (m/s) | 1.62 | 0.21 |
| Running velocity (m/s) | 4.11 | 0.44 |

Table S2: Input peak medial tibiofemoral forces during walking and running

**Sensitivity analyses** – linear line of best fit included to highlight the nature of the data distribution.

**Anterior femoral arc in sagittal plane**

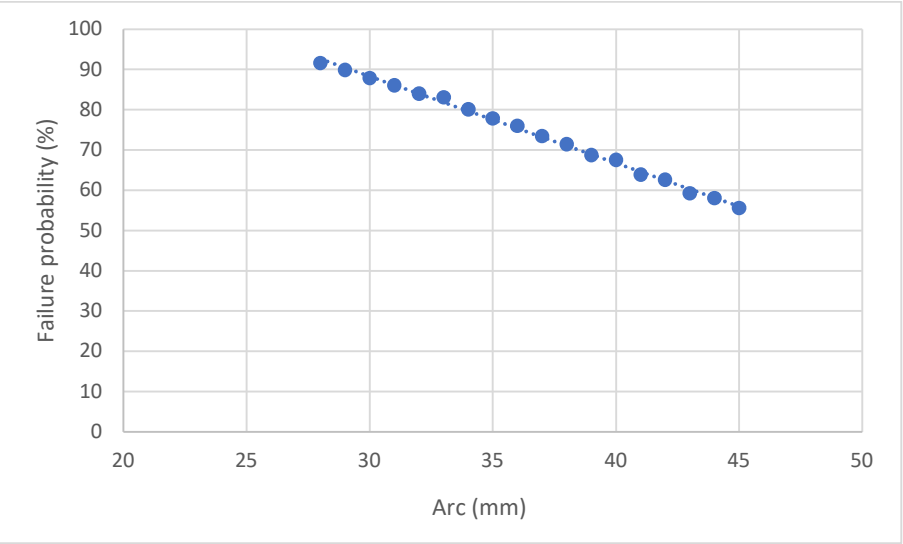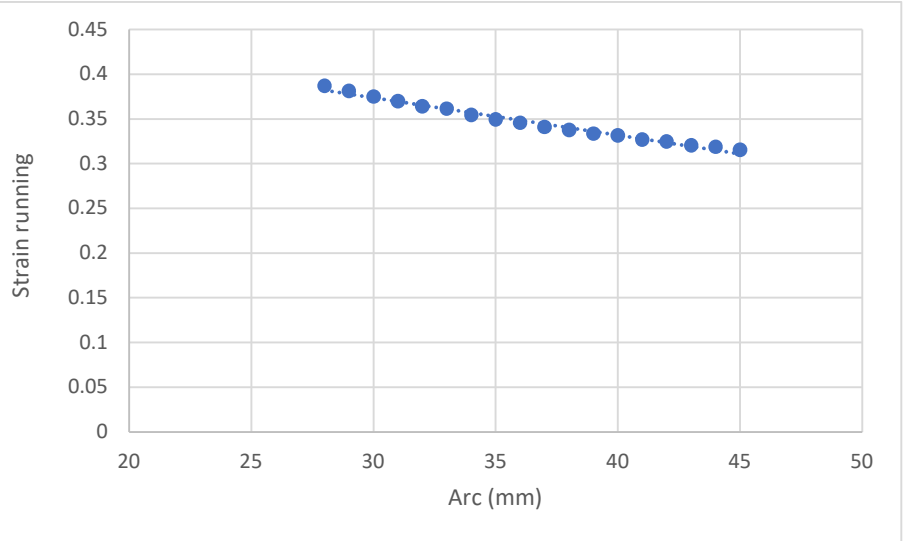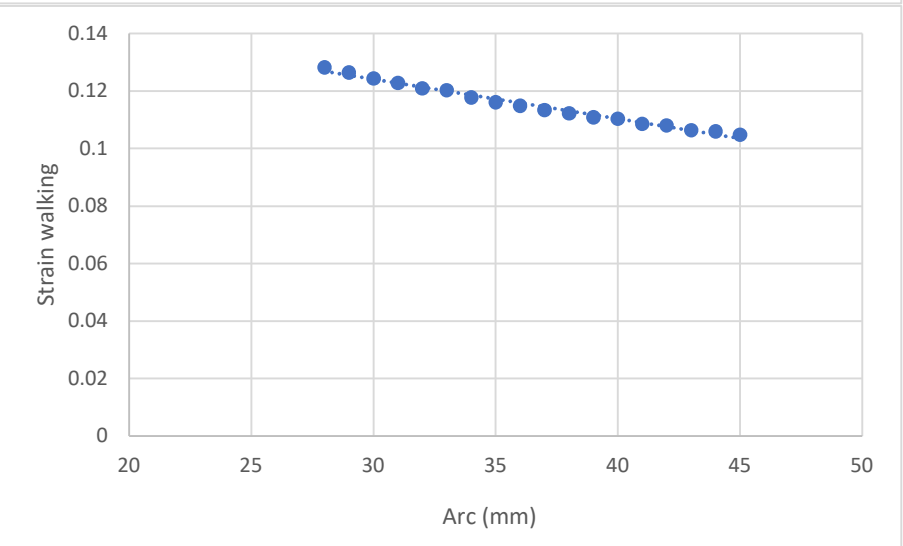

**Femoral cartilage modulus**

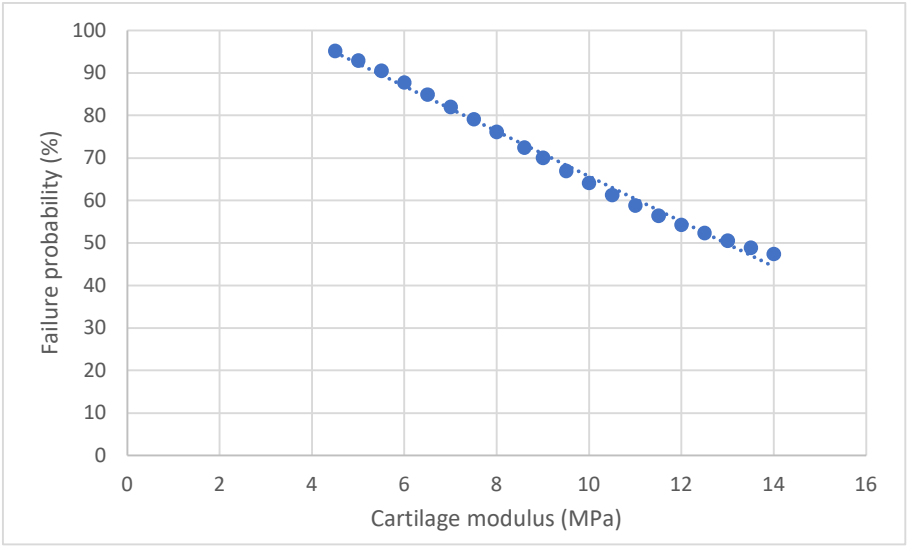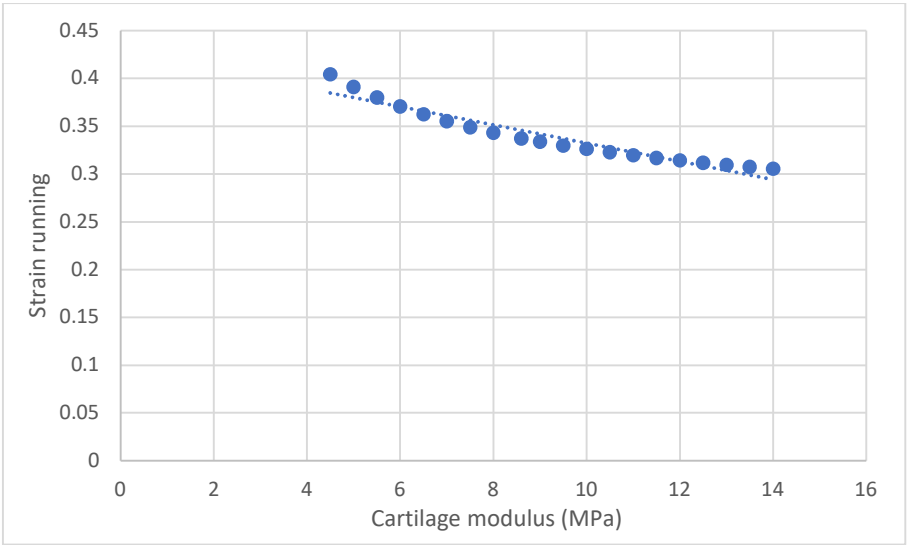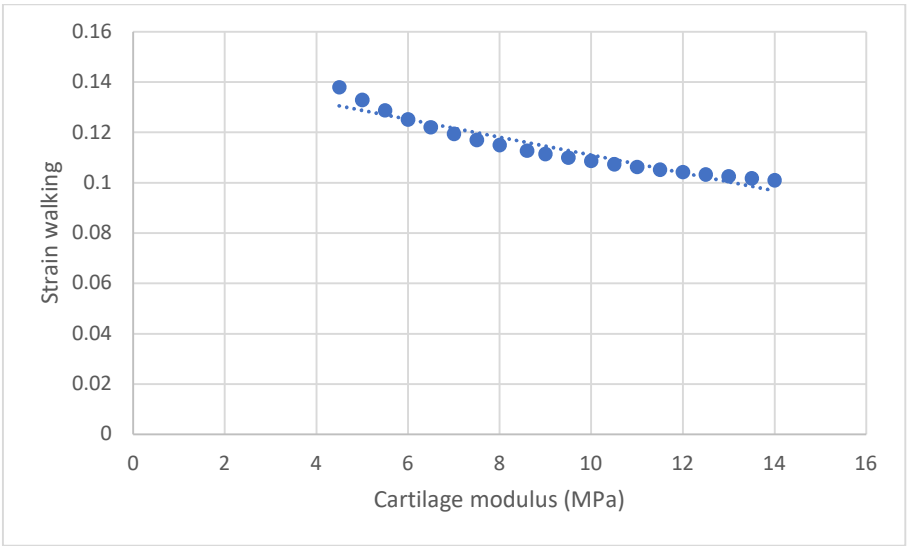

**Covered tibial cartilage modulus**

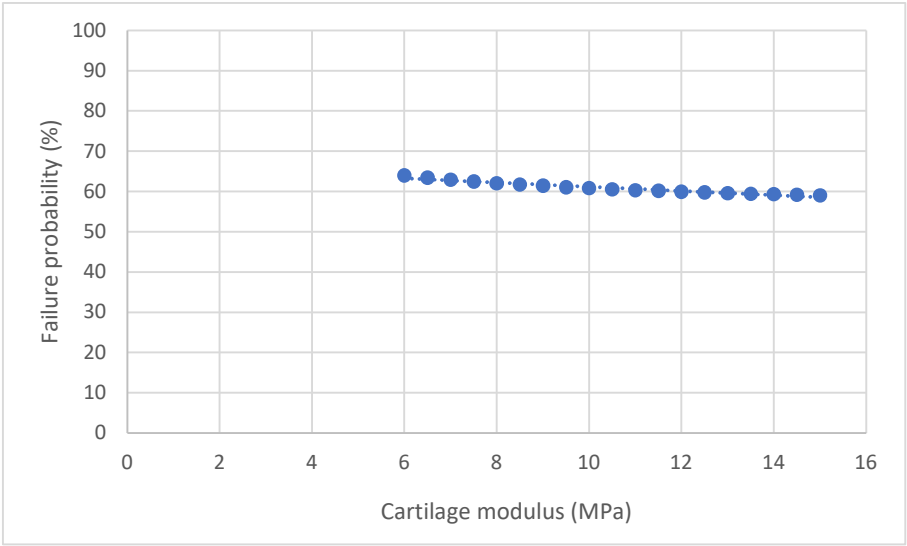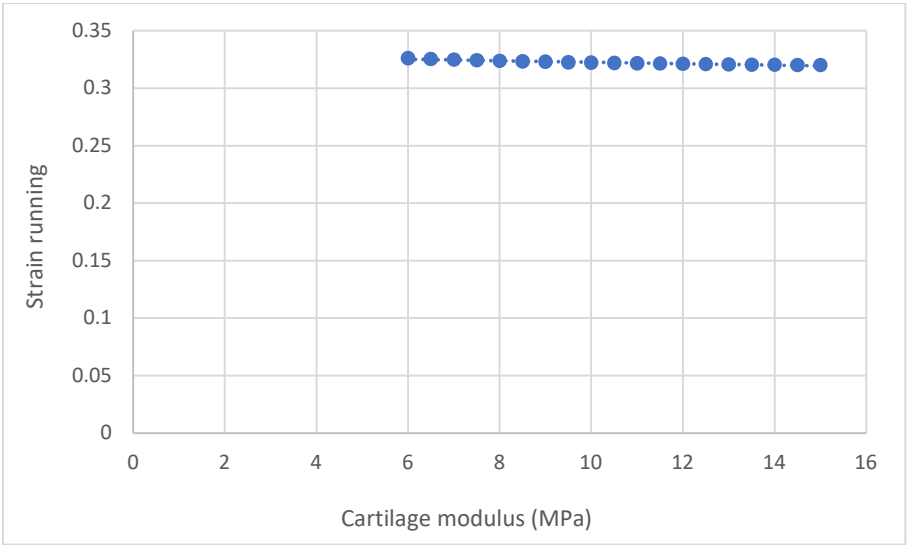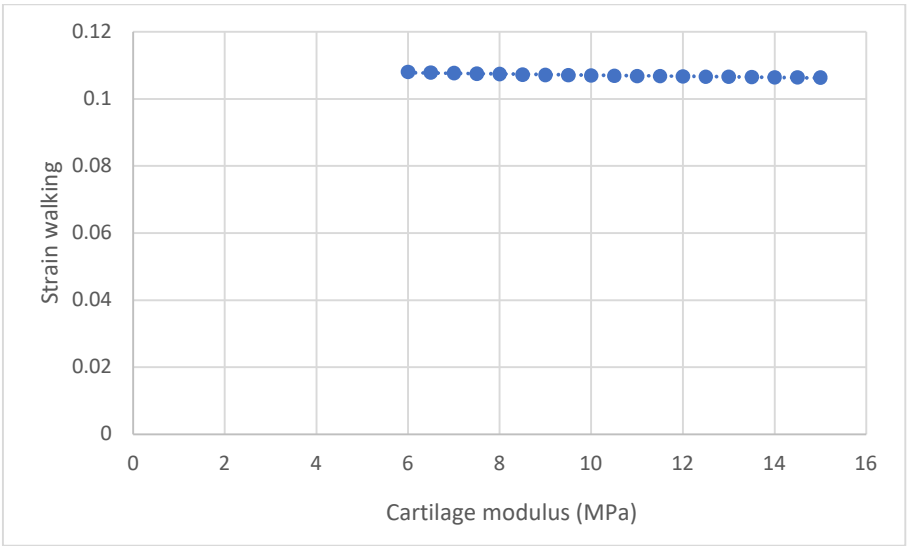

**Uncovered tibial cartilage modulus**

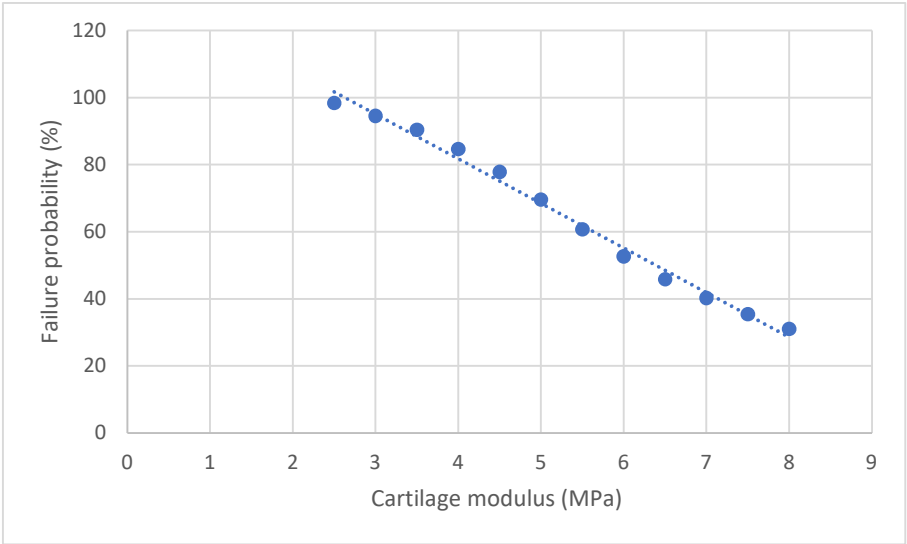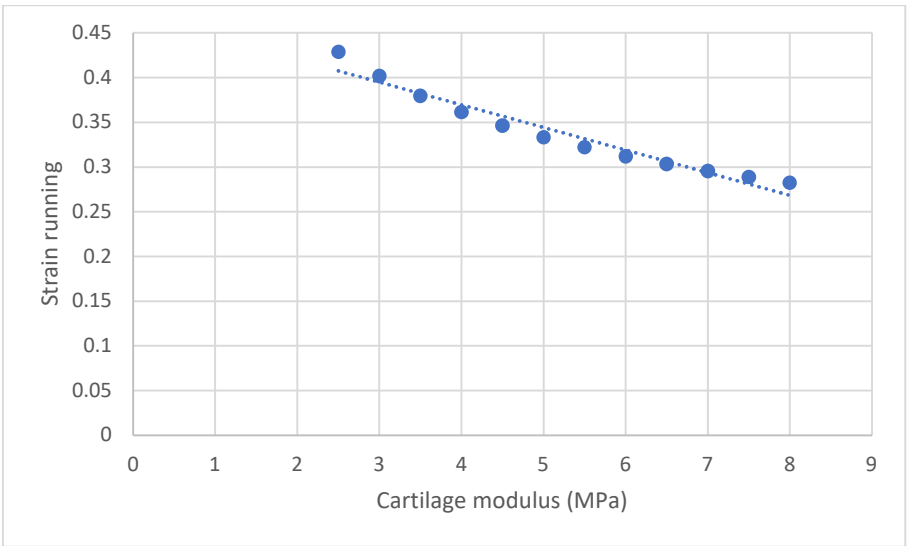

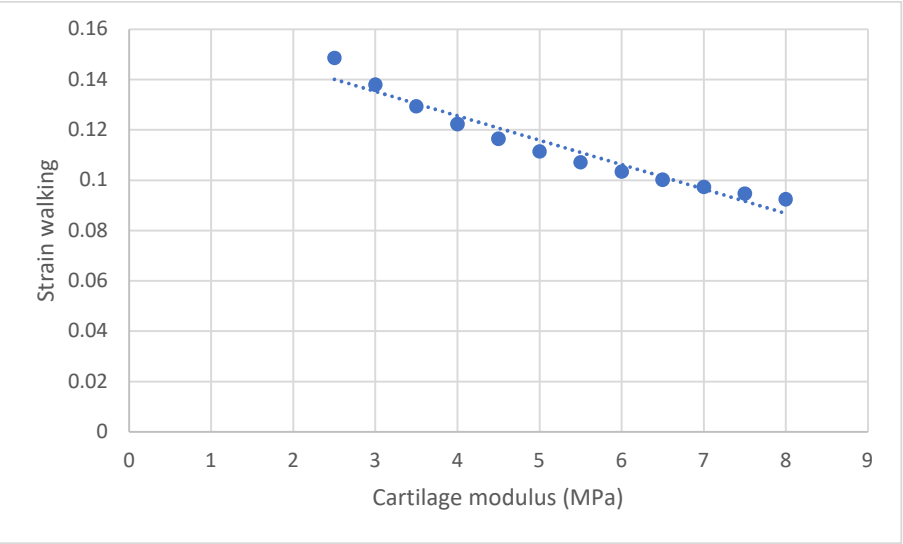

**Meniscus modulus**

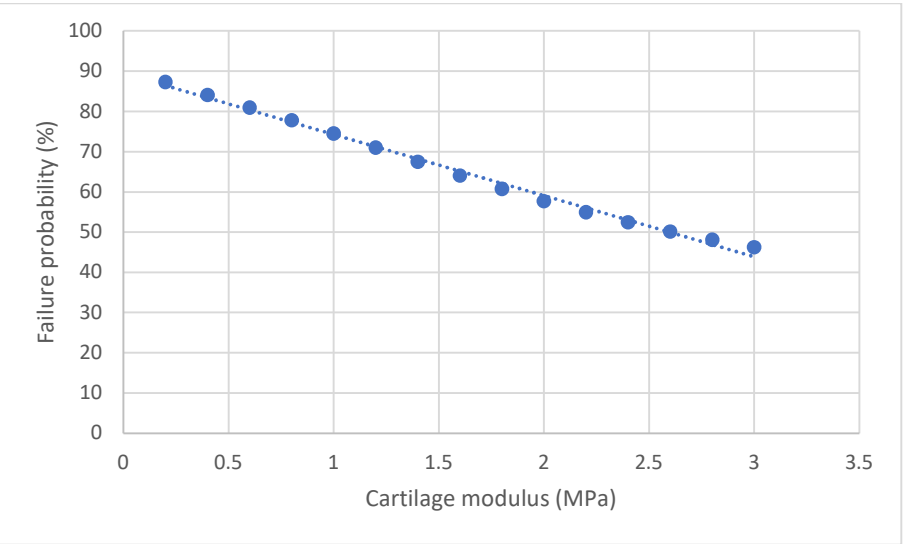

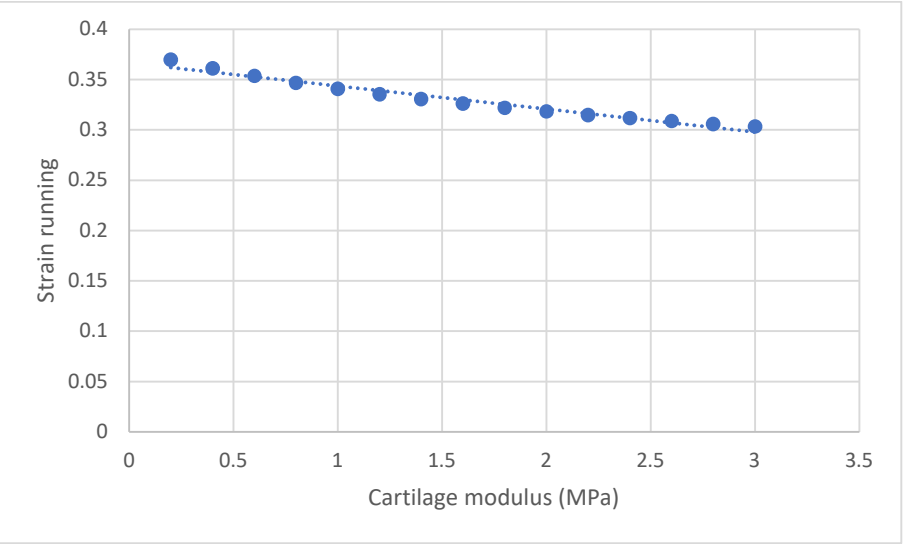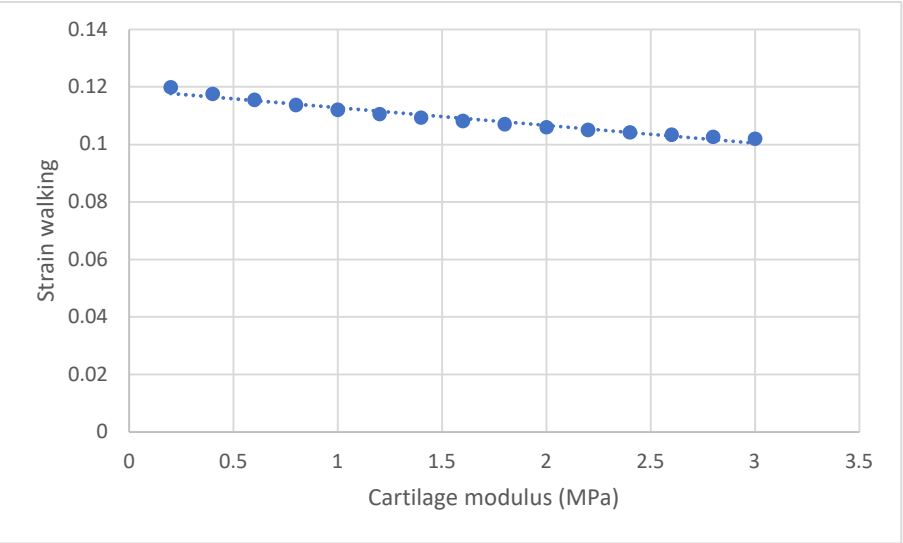

**Unloaded cartilage height**

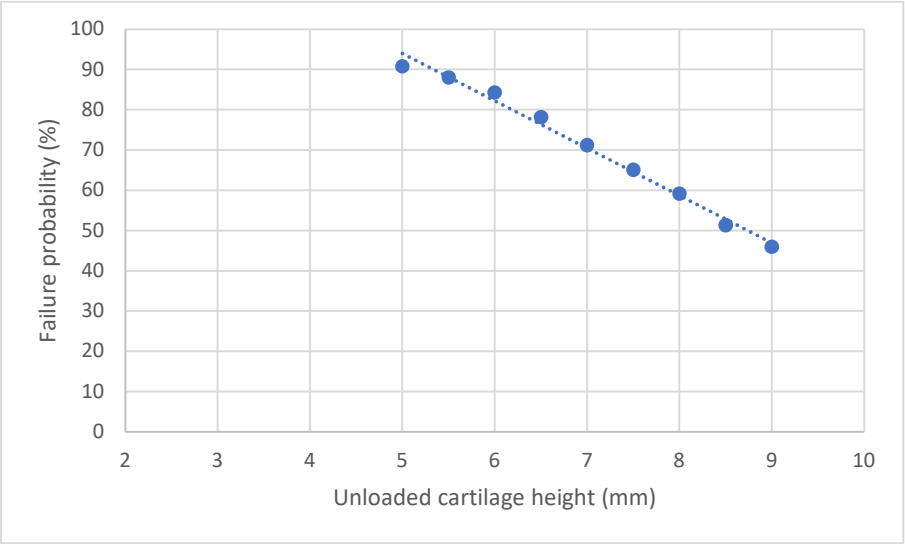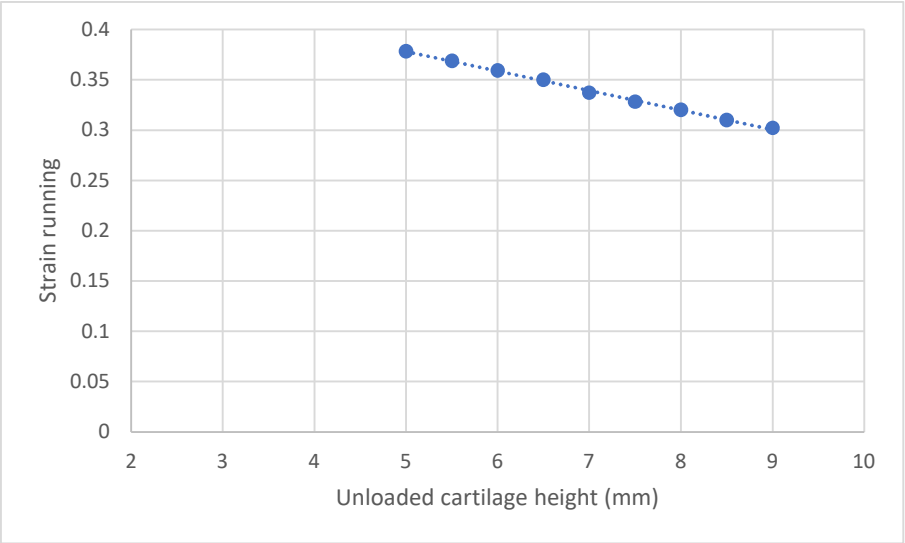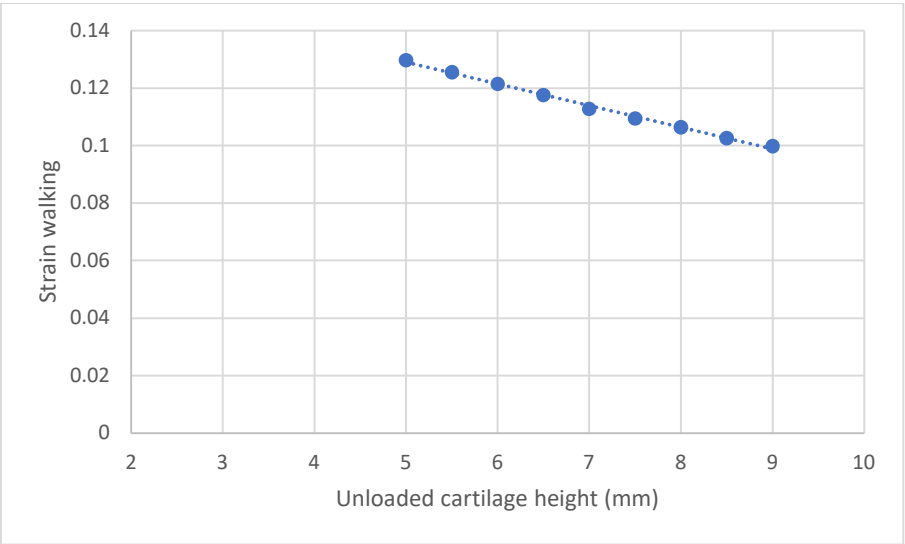

**Frontal tibial arc**

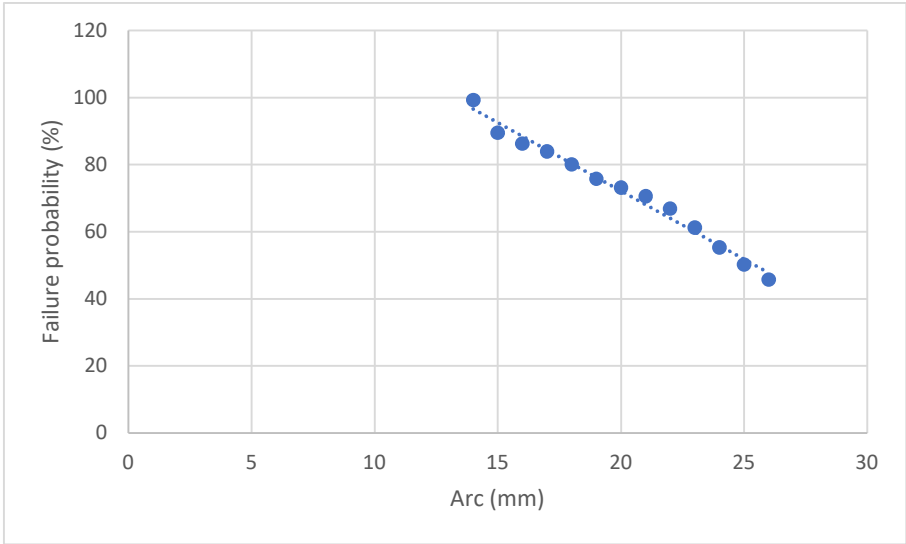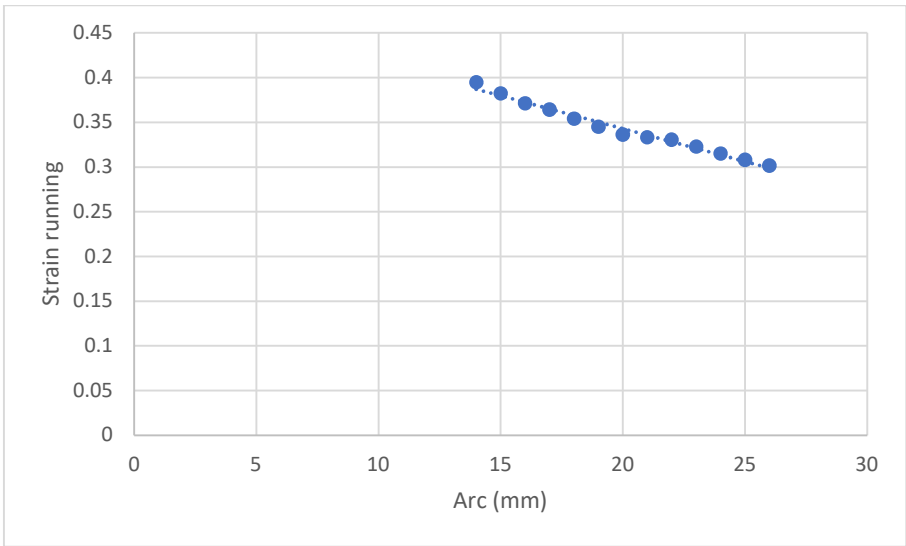

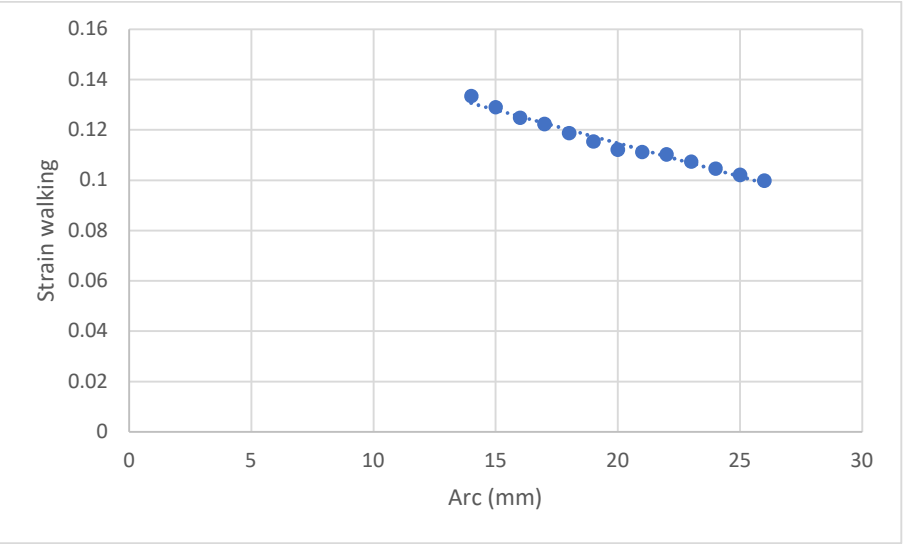

**Poisson's ratio**

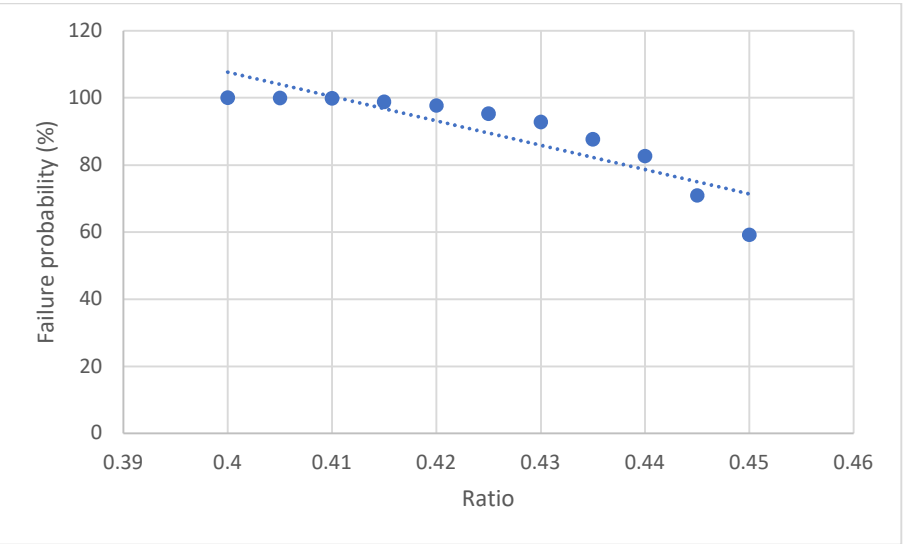

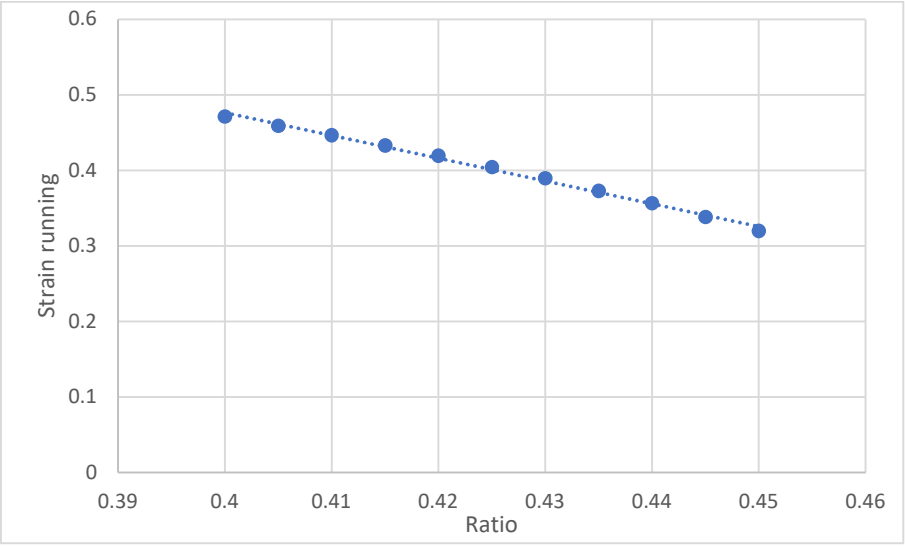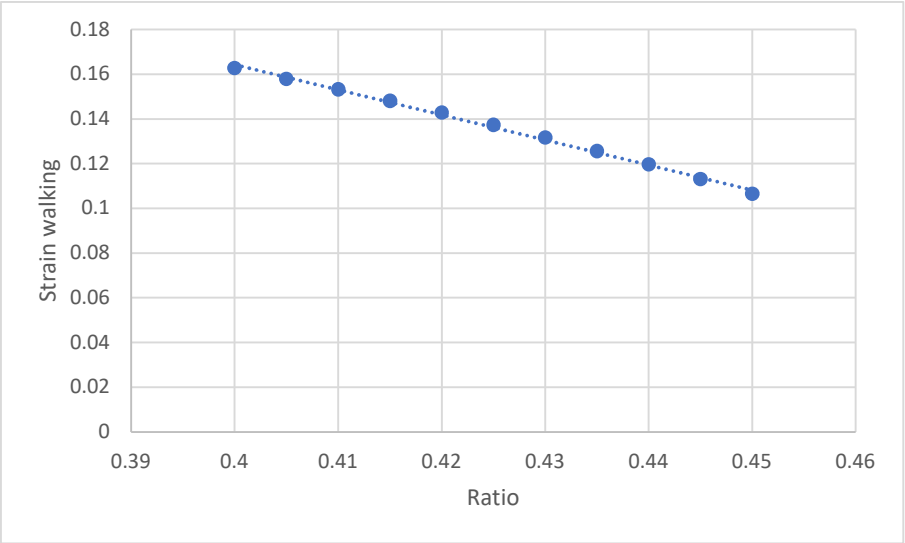

### Section S3.

#### 1. Muscle forces

Table S3: Muscle force parameters during running.

|                                          | Non-habitual |      |              |      | Habitual |      |              |      |
|------------------------------------------|--------------|------|--------------|------|----------|------|--------------|------|
|                                          | Minimal      |      | Conventional |      | Minimal  |      | Conventional |      |
|                                          | Mean         | SD   | Mean         | SD   | Mean     | SD   | Mean         | SD   |
| Peak biceps femoris long head force (BW) | 0.43         | 0.14 | 0.49         | 0.17 | 0.39     | 0.08 | 0.40         | 0.13 |

|                                           |            |           |            |           |            |           |            |           |
|-------------------------------------------|------------|-----------|------------|-----------|------------|-----------|------------|-----------|
| Biceps femoris long head impulse (BW·ms)  | 18.01      | 10.0<br>1 | 26.32      | 12.0<br>3 | 11.34      | 7.69      | 15.37      | 14.1<br>0 |
| Peak biceps femoris short-head force (BW) | 0.94       | 0.22      | 0.84       | 0.25      | 0.79       | 0.20      | 0.68       | 0.19      |
| Biceps femoris short head impulse (BW·ms) | 40.59      | 10.5<br>0 | 33.96      | 12.0<br>9 | 31.04      | 13.3<br>0 | 25.47      | 11.7<br>0 |
| Peak gracilis force (BW)                  | 0.10       | 0.04      | 0.07       | 0.03      | 0.08       | 0.04      | 0.08       | 0.04      |
| Gracilis impulse (BW·ms)                  | 2.65       | 1.15      | 2.36       | 1.07      | 2.12       | 0.69      | 2.06       | 0.68      |
| Peak lateral gastrocnemius force (BW)     | 1.09       | 0.17      | 0.99       | 0.14      | 0.97       | 0.13      | 0.88       | 0.18      |
| Lateral gastrocnemius impulse (BW·ms)     | 69.54      | 16.2<br>0 | 55.00      | 7.89      | 68.54      | 8.96      | 57.66      | 10.6<br>2 |
| Peak medial gastrocnemius force (BW)      | 2.44       | 0.31      | 2.38       | 0.36      | 2.38       | 0.41      | 2.20       | 0.49      |
| Medial gastrocnemius impulse (BW·ms)      | 156.8<br>5 | 31.1<br>8 | 140.5<br>8 | 23.5<br>0 | 182.3<br>2 | 24.5<br>7 | 156.3<br>3 | 33.9<br>6 |
| Peak rectus femoris force (BW)            | 2.41       | 0.22      | 2.39       | 0.11      | 2.29       | 0.28      | 2.36       | 0.39      |
| Rectus femoris impulse (BW·ms)            | 218.7<br>4 | 34.9<br>2 | 234.3<br>5 | 44.0<br>6 | 236.7<br>9 | 46.4<br>5 | 230.4<br>7 | 68.3<br>5 |
| Peak sartorius force (BW)                 | 0.29       | 0.02      | 0.28       | 0.03      | 0.26       | 0.03      | 0.25       | 0.04      |
| Sartorius impulse (BW·ms)                 | 20.92      | 5.45      | 19.73      | 6.29      | 17.57      | 4.79      | 14.87      | 5.44      |
| Peak semimembranosus force (BW)           | 0.59       | 0.16      | 0.59       | 0.17      | 0.59       | 0.12      | 0.62       | 0.13      |
| Semimembranosus impulse (BW·ms)           | 33.71      | 9.38      | 39.75      | 14.8<br>3 | 35.25      | 12.0<br>9 | 34.47      | 18.8<br>2 |
| Peak semitendinosus force (BW)            | 0.27       | 0.08      | 0.25       | 0.09      | 0.24       | 0.09      | 0.25       | 0.06      |
| Semitendinosus impulse (BW·ms)            | 12.99      | 7.78      | 13.23      | 7.18      | 11.21      | 9.36      | 12.11      | 9.18      |
| Peak vastus intermedius force (BW)        | 1.93       | 0.31      | 2.02       | 0.34      | 1.89       | 0.49      | 1.99       | 0.59      |
| Vastus intermedius impulse (BW·ms)        | 180.2<br>2 | 25.4<br>4 | 196.0<br>7 | 34.6<br>9 | 177.2<br>7 | 40.4<br>7 | 182.5<br>7 | 50.0<br>0 |
| Peak vastus lateralis force (BW)          | 3.08       | 0.36      | 3.24       | 0.41      | 2.98       | 0.64      | 3.11       | 0.83      |
| Vastus lateralis impulse (BW·ms)          | 279.1<br>1 | 40.9<br>4 | 308.0<br>5 | 55.4<br>8 | 271.5<br>0 | 60.6<br>5 | 280.8<br>6 | 72.9<br>5 |
| Peak vastus medialis force (BW)           | 1.72       | 0.28      | 1.82       | 0.33      | 1.74       | 0.46      | 1.83       | 0.54      |
| Peak vastus medialis impulse (BW·ms)      | 161.5<br>1 | 23.1<br>0 | 175.4<br>4 | 31.2<br>2 | 160.5<br>6 | 37.2<br>8 | 165.9<br>9 | 46.0<br>1 |

In the habitual minimal footwear group, biceps femoris short head impulse ( $b = 5.57$  (95% CI = 3.34 – 7.80),  $t = 5.23$ ,  $P < 0.001$ ), peak biceps femoris short head force ( $b = 0.10$  (95% CI = 0.05 – 0.16),  $t = 3.85$ ,  $P = 0.001$ ), lateral gastrocnemius

impulse ( $b = 10.88$  (95% CI = 4.53 – 17.22),  $t = 3.59$ ,  $P=0.002$ ), peak lateral gastrocnemius force ( $b = 0.09$  (95% CI = 0.03 – 0.15),  $t = 2.97$ ,  $P=0.008$ ), medial gastrocnemius impulse ( $b = 25.99$  (95% CI = 9.43 – 42.56),  $t = 3.28$ ,  $P=0.004$ ), peak medial gastrocnemius force ( $b = 0.18$  (95% CI = 0.05 – 0.31),  $t = 2.86$ ,  $P=0.01$ ), sartorius impulse ( $b = 2.70$  (95% CI = 1.63 – 3.78),  $t = 5.26$ ,  $P<0.001$ ) and peak sartorius force ( $b = 0.01$  (95% CI = 0.001 – 0.03),  $t = 2.33$ ,  $P=0.031$ ) were significantly greater in the minimal in relation to conventional footwear. However, in the same group, peak vastus medialis force was significantly larger ( $b = 0.10$  (95% CI = 0.01 – 0.20),  $t = 2.42$ ,  $P=0.039$ ) in the conventional compared to minimal footwear (Table S3).

In the non-habitual minimal footwear group, biceps femoris short head impulse ( $b = 6.63$  (95% CI = 1.38 – 11.87),  $t = 2.64$ ,  $P=0.016$ ), peak biceps femoris short head force ( $b = 0.10$  (95% CI = 0.04 – 0.16),  $t = 3.39$ ,  $P=0.003$ ), peak gracilis force ( $b = 0.03$  (95% CI = 0.002 – 0.05),  $t = 2.32$ ,  $P=0.032$ ), lateral gastrocnemius impulse ( $b = 14.54$  (95% CI = 9.31 – 19.78),  $t = 5.82$ ,  $P<0.001$ ) and peak lateral gastrocnemius force ( $b = 0.10$  (95% CI = 0.01 – 0.19),  $t = 2.44$ ,  $P=0.025$ ) were significantly greater in the minimal in relation to conventional footwear. However, biceps femoris long head impulse ( $b = 8.31$  (95% CI = 3.81 – 12.80),  $t = 3.87$ ,  $P=0.001$ ), rectus femoris impulse ( $b = 15.61$  (95% CI = 2.45 – 28.78),  $t = 2.48$ ,  $P=0.023$ ), semimembranosus impulse ( $b = 6.04$  (95% CI = 2.05 – 10.04),  $t = 3.17$ ,  $P=0.005$ ), vastus lateralis impulse ( $b = 28.94$  (95% CI = 4.30 – 53.59),  $t = 2.46$ ,  $P=0.024$ ), vastus medialis impulse ( $b = 13.93$  (95% CI = 0.51 – 28.37),  $t = 2.40$ ,  $P=0.048$ ) and vastus intermedius impulse ( $b = 15.85$  (95% CI = 0.14 – 31.84),  $t = 2.51$ ,  $P=0.022$ ) were significantly in the conventional compared to minimal footwear (Table S3).

## Section S4.

### 1. Spatiotemporal variables

Table S4: Spatiotemporal variables during walking.

|                   | Non-habitual |      | Habitual |      |
|-------------------|--------------|------|----------|------|
|                   | Mean         | SD   | Mean     | SD   |
| Velocity (m/s)    | 1.45         | 0.14 | 1.58     | 0.19 |
| Stride length (m) | 1.52         | 0.08 | 1.58     | 0.18 |

Walking velocity was found to be significantly faster in the habitual minimal footwear group ( $b = 0.13$  (95% CI = 0.03 – 0.24),  $t = 2.52$ ,  $P=0.016$ ) (Table S4).

### 2. Joint contact forces

Table S5: Joint contact force parameters during walking.

|                                     | Non-habitual |      | Habitual |      |
|-------------------------------------|--------------|------|----------|------|
|                                     | Mean         | SD   | Mean     | SD   |
| Peak medial tibiofemoral force (BW) | 2.85         | 0.54 | 3.05     | 0.53 |

|                                            |      |      |      |      |
|--------------------------------------------|------|------|------|------|
| Medial tibiofemoral cumulative load (BW/m) | 1.34 | 0.23 | 1.27 | 0.22 |
|--------------------------------------------|------|------|------|------|

No significant differences in medial tibiofemoral forces were observed between groups (Table S5).

### 3. Stress/ strain

Table S6: Stress/ strain parameters during walking.

|                                       | Non-habitual |      | Habitual |      |
|---------------------------------------|--------------|------|----------|------|
|                                       | Mean         | SD   | Mean     | SD   |
| Peak medial tibiofemoral stress (MPa) | 2.22         | 0.53 | 2.35     | 0.34 |
| Peak medial tibiofemoral strain       | 0.15         | 0.03 | 0.15     | 0.02 |

|                                      | Non-habitual |      |              |      | Habitual |      |              |      |          |
|--------------------------------------|--------------|------|--------------|------|----------|------|--------------|------|----------|
|                                      | Minimal      |      | Conventional |      | Minimal  |      | Conventional |      |          |
|                                      | Mean         | SD   | Mean         | SD   | Mean     | SD   | Mean         | SD   |          |
| Peak lateral tibiofemoral force (BW) | 4.38         | 0.98 | 4.00         | 0.55 | 3.80     | 0.72 | 3.74         | 0.69 | <i>B</i> |

No significant differences in medial tibiofemoral contact mechanics were observed between groups (Table S6).

## Section S5.

### 1. Lateral tibiofemoral forces

|                                       | R <sup>2</sup> | P      |
|---------------------------------------|----------------|--------|
| Peak medial tibiofemoral force (BW)   | 0.262          | <0.001 |
| Peak medial tibiofemoral stress (MPa) | 0.152          | 0.01   |
| Peak medial tibiofemoral strain       | 0.141          | 0.02   |

Table S7: Lateral joint contact force parameters

Notes: *B* = significant difference between minimal and conventional footwear in non-habitual group.

## Section S6.

### 1. Regression analyses.

Table S7: Regression coefficient of determination values with running velocity as predictor.

2. Comparisons between footwear with running velocity included as a co-variate.

#### Habitual minimal footwear users

Peak medial tibiofemoral force ( $b = 0.23$  (95% CI = -0.63 – 1.11),  $t = 0.89$ ,  $P=0.581$ ) was not significantly different between the conventional and minimal footwear. However, peak stress ( $b = 0.48$  (95% CI = 0.06 – 0.95),  $t = 1.98$ ,  $P=0.048$ ) and strain ( $b = 0.02$  (95% CI = 0.003 – 0.04),  $t = 1.99$ ,  $P=0.047$ ) were significantly greater in conventional footwear.

#### Non-habitual minimal footwear users

There were no differences in peak medial tibiofemoral force ( $b = 0.15$  (95% CI = -0.39 – 0.69),  $t = 0.55$ ,  $P=0.59$ ), peak strain ( $b = 0.27$  (95% CI = -0.13 – 0.67),  $t = 1.37$ ,  $P=0.18$ ) or peak stress ( $b = 0.01$  (95% CI = -0.006 – 0.03),  $t = 1.34$ ,  $P=0.19$ ) between minimal or conventional footwear.
